# Supplementary material for: Stroke Outreach in an Inner City Market: A Platform for Identifying African American Males for Stroke Prevention Interventions
Source: PubMed Central journal article supplement (PMC4467175; doi:10.3389/fneur.2015.00133), 2015-06-15
Supplement: presentation_1.pdf [file presentation_1.pdf]

## Stroke Knowledge Questionnaire

Select the best answer for each question. The best answer may be “all of the above.”

1. Where in the body does a stroke occur?
  - a. Heart
  - b. Brain
  - c. Kidneys
  - d. Lungs
  
2. Which of the following could represent a stroke?
  - a. Sudden loss of vision
  - b. Weakness on one side of the body
  - c. Sudden onset of slurred speech
  - d. All of the above
  
3. There is no treatment for stroke once it occurs.
  - a. True
  - b. False
  
4. Which of the following increase(s) a person’s risk of stroke?
  - a. High blood pressure
  - b. Smoking cigarettes
  - c. Diabetes (high blood sugar)
  - d. All of the above
  
5. Which of the following medications is/ are used to prevent stroke?
  - a. Aspirin
  - b. Tylenol
  - c. Valium
  - d. All of the above
  
6. What should you do if you experience signs or symptoms of stroke?
  - a. Call your primary care doctor
  - b. Take an aspirin and wait until symptoms resolve
  - c. Take a nap
  - d. Call 911 immediately
  
7. Stress is the number one risk factor for stroke
  - a. True
  - b. False
  
8. Which of the following can a person do to decrease their risk of stroke?
  - a. Stop smoking cigarettes
  - b. Stop drinking coffee

- c. Avoid exercise
  - d. All of the above
9. Stroke is the 3<sup>rd</sup> leading cause of death in Maryland.
- a. True
  - b. False
10. Which of the following is associated with increased risk of stroke
- a. Sleep apnea
  - b. Large waist size
  - c. Irregular heart rate
  - d. All of the above
